# Supplementary material for: Transcriptome Analysis of Pacific White Shrimp (Litopenaeus vannamei) Hepatopancreas in Response to Taura Syndrome Virus (TSV) Experimental Infection
Source: PLoS One. 2013 Feb 28;8(2):e57515. doi: 10.1371/journal.pone.0057515 (PMC3585375; doi:10.1371/journal.pone.0057515)
Supplement: Table S2 — Length distribution of cleaned reads in the TSV infected library. (XLS) [file pone.0057515.s002.xls]

Length distribution of cleaned reads in the TSV infected library.
Parameter	Length(bp)		Length (bp)	Number of sequences
N20	512		21-40	0
N30	492		41-60	2396
N50	454		61-80	3651
N70	390		81-100	3344
N90	267		101-120	2323
Average length	367		121-140	2352
Maximum length	619		141-160	2282
Total sequence number	126919		161-180	2446
			181-200	2676
			201-220	2570
			221-240	2681
			241-260	2817
			261-280	3245
			281-300	2982
			301-320	4113
			321-340	5513
			341-360	4511
			361-380	5447
			381-400	6140
			401-420	5712
			421-440	7267
			441-460	8912
			461-480	9963
			481-500	10913
			501-520	8787
			521-540	10294
			541-560	2990
			561-580	497
			581-600	85
			601-620	10
			621-640	0
			641-660	0
			661-680	0
			681-700	0
