# Supplementary material for: Transcriptome Analysis of Pacific White Shrimp (Litopenaeus vannamei) Hepatopancreas in Response to Taura Syndrome Virus (TSV) Experimental Infection
Source: PLoS One. 2013 Feb 28;8(2):e57515. doi: 10.1371/journal.pone.0057515 (PMC3585375; doi:10.1371/journal.pone.0057515)
Supplement: Table S3 — Length distribution of cleaned reads in the non-infected library. (XLS) [file pone.0057515.s003.xls]

Length distribution of cleaned reads in the control library.
Parameter	Length(bp)		Length (bp)	Number of sequences
N20	506		21-40	0
N30	488		41-60	2110
N50	454		61-80	3099
N70	390		81-100	2643
N90	262		101-120	2001
Average length	364		121-140	1950
Maximum length	611		141-160	2038
Total sequence number	102181		161-180	2216
			181-200	2197
			201-220	2237
			221-240	2137
			241-260	2316
			261-280	2431
			281-300	2300
			301-320	3141
			321-340	4015
			341-360	3656
			361-380	4393
			381-400	4764
			401-420	4587
			421-440	5909
			441-460	7299
			461-480	9238
			481-500	9250
			501-520	6621
			521-540	7033
			541-560	2227
			561-580	314
			581-600	52
			601-620	7
			621-640	0
			641-660	0
			661-680	0
			681-700	0
